# Supplementary material for: Genome-wide identification and expression analysis of the cyclic nucleotide-gated ion channel (CNGC) gene family in Saccharum spontaneum
Source: BMC Genomics. 2023 May 25;24:281. doi: 10.1186/s12864-023-09307-3 (PMC10214738; doi:10.1186/s12864-023-09307-3)
Supplement: Supplementary file 7 — Additional file 7: Supplementary Table 2. Detailed physiological and biochemical information of SsCNGC genes and their alleles. [file 12864_2023_9307_MOESM7_ESM.xlsx]

## Sheet: Sheet 1
Supplementary Table 2: Detailed physiological and biochemical information of SsCNGC genes and their alleles
	name		id	chr	start	end	cds_len	protein_len	intron_number	exon_number	MW(Da)	pI	GRAVY
SsCNGC1	SsCNGC1-1A	SsCNGC1	Sspon.04G0014070-1A	Chr4A	51882842	51906635	2193	731	9	10	83411.6	9.25	-0.128
	SsCNGC1-1P	SsCNGC1-1P	Sspon.04G0014070-1P	Chr4C	56169725	56192699	2061	687	8	9	78515	9.2	-0.093
	SsCNGC1-2C	SsCNGC1-2C	Sspon.04G0014070-2C	Chr4C	51837551	51838243	693	230	0	1	26241	8.83	-0.405
SsCNGC2	SsCNGC2-1A	SsCNGC2-1A	Sspon.08G0008040-1A	Chr8A	29177073	29180335	1032	344	4	5	39488.2	10.34	-0.162
	SsCNGC2-1P	SsCNGC2	Sspon.08G0008040-1P	Chr8A	31202765	31214757	2478	826	10	11	94521.3	9.49	-0.197
	SsCNGC2-2B	SsCNGC2-2B	Sspon.08G0008040-2B	Chr1B	116459240	116460941	849	283	2	3	32638.2	9.85	-0.127
SsCNGC3	SsCNGC3-1A	SsCNGC3	Sspon.04G0014080-1A	Chr4A	51908179	51911281	1197	399	2	3	46043.1	8.78	-0.201
	SsCNGC3-2B	SsCNGC3-2B	Sspon.04G0014080-2B	Chr4B	55289443	55290031	588	417	0	1	48072.4	8.65	-0.176
SsCNGC4	SsCNGC4-1B	SsCNGC4	Sspon.05G0022360-1B	Chr5B	3204292	3211306	2007	717	7	8	81742.4	9.09	-0.08
	SsCNGC4-2D	SsCNGC4-2D	Sspon.05G0022360-2D	Chr5D	7201525	7208258	1704	568	4	5	64930.3	9.55	-0.132
SsCNGC5	SsCNGC5-1A	SsCNGC5	Sspon.01G0024280-1A	Chr1A	87156289	87158432	2106	702	1	2	80322.9	9.44	-0.112
	SsCNGC5-2B	SsCNGC5-2B	Sspon.01G0024280-2B	Chr1B	90464660	90466797	2055	685	1	2	78257.4	9.23	-0.136
	SsCNGC5-3C	SsCNGC5-3C	Sspon.01G0024280-3C	Chr1C	85489484	85491607	2124	707	0	1	81040.6	9.32	-0.133
	SsCNGC5-4D	SsCNGC5-4D	Sspon.01G0024280-4D	Chr1D	84656300	84658426	2127	709	0	1	81137.8	9.32	-0.135
SsCNGC6	SsCNGC6-1A	SsCNGC6	Sspon.02G0031610-1A	Chr2A	115677914	115680169	2256	752	0	1	85279.1	9.53	-0.204
	SsCNGC6-2D	SsCNGC6-2D	Sspon.02G0031610-2D	Chr2D	90370730	90372985	2256	752	0	1	85284.2	9.54	-0.185
SsCNGC7	SsCNGC7-1A	SsCNGC7	Sspon.04G0002010-1A	Chr4A	6199865	6205159	2106	702	5	6	79975.5	9.04	-0.04
	SsCNGC7-1T	SsCNGC7-1T	Sspon.04G0002010-1T	Chr4D	7299862	7300239	378	126	0	1	14107.3	9.33	0.067
	SsCNGC7-2B	SsCNGC7-2B	Sspon.04G0002010-2B	Chr4B	3602119	3606843	1494	498	2	3	57150.9	9.51	-0.279
	SsCNGC7-3D	SsCNGC7-3D	Sspon.04G0002010-3D	Chr4D	7326845	7331913	2106	702	5	6	80004.5	9.04	-0.035
SsCNGC8	SsCNGC8-1A	SsCNGC8	Sspon.08G0012670-1A	Chr8A	54096149	54100723	2043	681	6	7	78672.8	9.07	-0.148
	SsCNGC8-2B	SsCNGC8-2B	Sspon.08G0012670-2B	Chr8B	50602014	50606226	2022	674	6	7	77849	9.06	-0.136
	SsCNGC8-3C	SsCNGC8-3C	Sspon.08G0012670-3C	Chr8C	51885876	51890587	1512	504	4	5	58472.3	9.24	-0.292
	SsCNGC8-4D	SsCNGC8-4D	Sspon.08G0012670-4D	Chr8D	52634448	52639032	2043	681	6	7	78714.9	9.08	-0.149
SsCNGC9	SsCNGC9-1B	SsCNGC9	Sspon.02G0036020-1B	Chr2B	22343268	22348277	2133	711	6	7	82060.2	9.12	-0.23
	SsCNGC9-1T	SsCNGC9-1T	Sspon.02G0036020-1T	Chr2D	17464767	17470258	2133	711	6	7	82019.2	9.17	-0.234
	SsCNGC9-2D	SsCNGC9-2D	Sspon.02G0036020-2D	Chr2D	17447889	17453309	2133	711	6	7	82109.3	9.17	-0.235
SsCNGC10	SsCNGC10-1B	SsCNGC10	Sspon.04G0024390-1B	Chr4B	19113351	19116208	2268	756	5	6	87713.5	9.23	-0.094
	SsCNGC10-1T	SsCNGC10-1T	Sspon.04G0024390-1T	Chr4D	23861263	23863940	2121	707	5	6	81954.1	9.5	-0.059
	SsCNGC10-2C	SsCNGC10-2C	Sspon.04G0024390-2C	Chr4C	22685172	22688020	2373	791	5	6	91709.7	9.61	-0.038
	SsCNGC10-3D	SsCNGC10-3D	Sspon.04G0024390-3D	Chr4D	23854026	23856794	2139	713	5	6	82508.6	9.31	-0.099
SsCNGC11	SsCNGC11-1A	SsCNGC11	Sspon.04G0008000-1A	Chr4A	22519276	22521836	2076	692	4	5	80257.1	9.53	-0.098
	SsCNGC11-2B	SsCNGC11-2B	Sspon.04G0008000-2B	Chr4B	19149775	19152634	2208	736	5	6	85294.8	9.41	-0.095
SsCNGC12	SsCNGC12-1C	SsCNGC12	Sspon.04G0031130-1C	Chr4C	7104138	7112895	2244	748	11	12	85657.9	9.06	-0.156
	SsCNGC12-2D	SsCNGC12-2D	Sspon.04G0031130-2D	Chr4D	8369306	8383279	2235	745	12	13	85279.4	9.04	-0.159
SsCNGC13	SsCNGC13-1B	SsCNGC13	Sspon.01G0049590-1B	Chr1B	113439670	113443089	1539	934	5	6	102299	9.19	-0.106
	SsCNGC13-1P	SsCNGC13-1P	Sspon.01G0049590-1P	Chr1B	113559683	113565013	2286	762	6	7	84498.4	9.37	-0.116
SsCNGC14	SsCNGC14-1A	SsCNGC14	Sspon.03G0005320-1A	Chr3A	15234428	15236678	1512	504	5	6	57220.7	9.79	-0.019
SsCNGC15	SsCNGC15-1B	SsCNGC15	Sspon.03G0030490-1B	Chr3B	21205167	21206785	915	305	3	4	34839.2	10.24	-0.302
SsCNGC16	SsCNGC16-1A	SsCNGC16	Sspon.07G0004720-1A	Chr7A	12173890	12175659	1473	491	2	3	55387.3	9.86	-0.051
	SsCNGC16-2B	SsCNGC16-2B	Sspon.07G0004720-2B	Chr7B	11402375	11406986	2070	690	3	4	76840.6	9.74	-0.097
	SsCNGC16-3C	SsCNGC16-3C	Sspon.07G0004720-3C	Chr7C	7306665	7311953	2067	689	5	6	76684.4	9.74	-0.093
	SsCNGC16-4D	SsCNGC16-4D	Sspon.07G0004720-4D	Chr7D	10753850	10758232	2241	746	4	5	83294.8	9.92	-0.228
