# Supplementary material for: Genome-wide identification and expression analysis of the cyclic nucleotide-gated ion channel (CNGC) gene family in Saccharum spontaneum
Source: BMC Genomics. 2023 May 25;24:281. doi: 10.1186/s12864-023-09307-3 (PMC10214738; doi:10.1186/s12864-023-09307-3)
Supplement: Supplementary file 9 — Additional file 9: Supplemental Table 4. The expression pattern of SsCNGCs based on FPKM in different tissues at different stages. [file 12864_2023_9307_MOESM9_ESM.xlsx]

## Sheet: Sheet1
Supplemental table 4: The expression pattern of SsCNGCs based on FPKM in different tissues at different stages.
	Developmental stages																Leaf gradients
name	Seedling						Pre-mature					Mature					Basal zone									Transition zone									Maturing zone												Mature zone
	seedling-leaf1	seedling-leaf2	seedling-leaf3	seedling-stem1	seedling-stem2	seedling-stem3	leaf-roll	leaf	stem-3	stem-6	stem-9	leaf-roll	leaf	stem3	stem6	stem9	1-1	1-2	1-3	2-1	2-2	2-3	3-1	3-2	3-3	4-1	4-2	4-3	5-1	5-2	5-3	6-1	6-2	6-3	7-1	7-2	7-3	8-1	8-2	8-3	9-1	9-2	9-3	10-1	10-2	10-3	11-1	11-2	11-3
SsCNGC1	7.5502	6.35818	7.85904	12.0391	13.2034	12.7545	4.63325	4.44285	12.2646	15.991	16.2644	6.62743	5.22588	12.04	10.6398	11.7735	17.71	22.05	19.89	23.88	21.2	22.03	17.56	14.68	19.75	10.55	9.57	13.05	10.6	9.58	14.3	7.73	5.32	10.09	5.56	7.2	7.22	4.44	5.51	5.78	5.24	6.21	6.43	3.34	5.02	5.73	6.04	4.7	5.19
SsCNGC1-1P	6.44206	6.1315	5.12762	10.4878	11.0074	11.31	2.64303	4.1679	15.151	12.3112	12.6149	4.5747	4.36072	10.6769	10.6834	10.4762	32.82	30.1	29.31	27.08	33.6	25.29	23.84	21.61	27.55	17.36	14.58	20.94	12.75	12.25	17.5	8.08	10.85	14.55	8.5	6.58	11.73	8.1	8.14	11.25	6.76	9.64	7.78	5.66	7.26	6.61	7.33	7.57	7.48
SsCNGC1-2C	5.37416	4.73742	4.84714	10.1174	7.72709	8.587	3.25117	2.76615	7.51783	8.62265	8.87624	4.51565	3.29372	6.89443	8.00173	6.33816	6.82	6.5	8.55	16.63	2.91	20.62	2.78	5.08	13.17	4.98	2.92	5.18	1.02	0	2.29	3.42	2.77	0	2.92	1.63	4.1	3	2.47	2.63	2.16	0.81	3.13	3.64	2.69	2.77	3.1	2.77	2.56
SsCNGC2-1A	5.63674	3.05881	4.16807	6.37599	6.85297	6.3986	4.60519	2.89053	6.35952	9.51948	7.06365	5.36191	4.77509	3.71003	2.82837	4.46312	6.41	6.61	4.9	7.15	9.96	3.6	11.07	13.35	6.44	10.8	14.32	10	12.74	13.75	12.26	10.08	10.93	11.59	9.06	12.1	12.69	9.57	11.44	9.99	9.94	10.06	11.46	6.59	7.48	10.57	9.84	10.22	9.41
SsCNGC2	5.08891	4.24827	4.51816	5.63895	4.0807	4.85261	4.26817	4.97316	4.41387	8.8511	8.87919	5.68728	4.47658	3.81637	4.39172	5.24584	3.68	3.66	4.23	4.04	5.87	3.49	5.98	11.2	4.6	6.34	11.59	6.92	8.03	10.83	8.04	6.98	10.82	7.24	6.96	8.56	6.64	6.37	10.67	7.03	7.73	7.78	7.89	4.38	6.64	7.36	7.03	6.74	7.46
SsCNGC2-2B	3.12195	2.21085	2.13817	2.31494	3.41682	2.25867	2.37764	1.66925	2.01306	3.68144	3.21798	2.26754	2.08587	1.15023	1.72356	1.65579	0.96	4.33	0.06	4.84	4.08	0	2.75	4.74	1.71	2.71	4.95	2.22	3.32	6.99	6.23	2.28	6.81	6.24	4.9	8.07	6.47	4.41	6.61	7	4.12	5.16	3.18	6.47	3.16	4.45	2.24	1.41	4.43
SsCNGC3	0	0	0.0368256	0	0	0	0	0	0	0	0	0	0	0	0	0	0.17	0.14	0.22	0	0	0.14	0.09	0	0.07	0.05	0.06	0	0.14	0	0	0.06	0.16	0.03	0	0.22	0.05	0.04	0.07	0	0	0	0.05	0	0.03	0	0.06	0	0
SsCNGC3-2B	0	0	0.0952719	0.162347	0	0	0	0	0	0	0	0	0	0.197685	0	0	0.15	0.19	0.1	0.1	0.27	0.02	0.12	0.23	0.41	0.14	0.27	0.25	0.21	0.17	0.13	0.11	0.44	0.21	0.1	0.2	0.19	0.07	0.32	0.07	0.09	0.03	0.1	0.15	0	0.03	0.03	0	0.14
SsCNGC4	2.73138	2.62779	2.52966	2.69811	2.15609	2.51313	0.726464	1.8456	0.187191	1.85424	2.35241	2.63049	2.96082	1.94193	2.13476	2.5356	5.89	9.91	6.95	9.87	9.93	7.53	9.05	9.78	10.2	8.43	9.14	8.54	11.25	10.17	11.74	7.22	10.48	10.27	8.1	10.79	9.8	9.41	12.9	12.43	10.64	10.84	9.56	7.72	9.21	10.88	8.06	8.01	10.44
SsCNGC4-2D	9.41046	10.4695	9.4748	10.838	9.38895	9.73974	4.51978	4.54647	3.15637	7.45599	11.3616	14.6484	11.9407	7.55469	10.4537	11.5106	10.77	10.24	10.41	10.84	11.92	9.79	10.57	9.95	9.95	9.53	10.61	9.94	10.35	10.42	11.03	10.03	10.68	10.61	12.34	14.14	12.39	10.34	12.52	11.29	10.52	10.72	12.13	9.24	9.35	12.05	8.85	9.29	10.52
SsCNGC5	0	0	0	0	0	0	0	0	0	0	0	0	0.0110769	0	0	0	0	0	0	0	0	0	0	0	0	0	0	0	0	0	0	0	0	0	0	0	0	0	0	0	0	0	0	0	0	0	0	0	0
SsCNGC5-2B	0	0	0	0	0	0	0	0	0	0	0	0	0	0	0	0	0	0	0	0	0	0	0	0	0.02	0	0	0	0	0	0	0	0	0	0	0	0	0	0	0.02	0	0	0	0	0	0	0	0	0
SsCNGC5-3C	0	0	0	0	0	0	0	0	0	0	0	0	0.0109721	0	0	0	0	0	0	0	0	0	0	0	0	0	0	0	0	0	0	0	0	0	0	0	0	0	0	0	0	0	0	0	0	0	0	0	0
SsCNGC5-4D	0	0	0	0	0	0	0	0	0	0	0	0	0.0109548	0	0	0	0	0	0	0	0	0	0	0	0	0	0	0	0	0	0	0	0	0	0	0	0	0	0	0	0	0	0	0	0	0	0	0	0
SsCNGC6	0	0	0	0	0	0	0	0	0	0	0.0585552	0	0.0410402	0	0	0	0	0.01	0	0	0.03	0.01	0.01	0	0.01	0.02	0	0	0.01	0	0.01	0.01	0.01	0.04	0	0.01	0.02	0	0	0.08	0.01	0	0.02	0	0	0.03	0.04	0.03	0
SsCNGC6-2D	0	0	0.0355985	0	0	0	0.13918	0	0	0	0.0585552	0	0.0410402	0	0	0	0	0.01	0	0	0.03	0.01	0.01	0	0.01	0.02	0.07	0.07	0.01	0.06	0.01	0.01	0.01	0	0.03	0.01	0.02	0.03	0.06	0	0.01	0	0.02	0	0	0	0.01	0	0
SsCNGC7	2.14493	1.90287	2.3065	4.26029	4.12743	4.16814	2.22574	1.65672	5.26434	4.02605	4.1721	3.40186	2.55537	6.25057	4.33965	4.68095	20.33	19.77	20.52	22.73	18.61	21.16	18.48	14.06	20.99	16.57	12.42	17.8	17.3	14.98	20.05	12.05	9.95	19.6	12.43	12.92	16.99	10.92	10.92	15.72	7.27	10.17	12.65	7.06	7.83	11.6	8.71	8.92	9.14
SsCNGC7-2B	2.70088	2.42252	2.64165	5.49863	5.48017	5.86218	2.58764	2.22335	5.81492	4.73866	5.49208	3.89106	2.80768	6.92117	5.87874	5.38999	2.39	2.19	2.3	3.01	2.97	4.32	2.69	2.66	3.49	2.49	2.36	2.33	0.95	1.46	2.74	2.42	1.72	3.18	1.72	0.44	1.59	2.22	1.17	2.01	2.02	1.86	0.99	2.21	2.73	2.01	0.69	0	1.81
SsCNGC7-3D	1.46495	1.90155	1.76132	3.53347	3.36015	3.13165	2.48693	1.18806	2.67902	4.52231	2.76983	2.76303	1.71773	6.11227	4.87492	3.61344	2.9	3.77	3.48	2.65	6.24	4.69	4.09	4.87	3.21	3.64	4	3.1	3.03	2.92	3.72	4.41	3.43	3.46	2.11	2.84	4.94	2.61	2.69	3.46	2.38	2.83	2.86	1.93	3.22	1.78	2.17	1.26	2.56
SsCNGC8	4.01447	3.61631	3.62957	2.10804	2.91969	2.72659	2.91265	3.4817	0.889745	1.7805	3.36363	4.33688	4.47615	1.2052	1.67519	1.75707	1.51	1.97	1.98	2.6	4.77	1.83	4.51	4.86	3.96	5.63	5.13	4.73	6.73	6.13	6.61	4.98	5.4	6.32	5.36	5.86	8.32	5.63	6.13	6.6	4.9	6.24	6.31	4.91	4.62	5.77	4.63	4.32	7.04
SsCNGC8-2B	1.2227	1.51687	1.30317	1.17989	1.5311	1.4102	0.579472	0.657283	0.513508	1.29242	0.751702	2.32565	2.23824	1.24904	1.17893	0.96121	1.85	2.08	1.95	2.78	2.88	1.33	4.14	4.6	3.17	4.21	4.98	4.33	5.85	5.65	5.91	6.1	5.59	7.28	5.4	4.35	7.17	5.4	4.57	6.42	3.75	4.28	4.96	3.32	3.53	5.42	3.26	3.29	4.08
SsCNGC8-3C	1.97384	1.69627	1.80775	1.6129	1.201	1.50077	1.16269	1.7936	0.309107	1.19286	0.672607	2.30109	2.02774	0.632756	1.07653	0.85	1.11	1.22	1.88	1.66	1.95	1.5	3.36	1.91	1.86	4.01	3.41	2.82	4.2	3.26	4.64	3.94	3.04	3.99	4.36	4.55	4.21	3.41	3.48	5.23	3.07	3.4	4.18	2.04	2.84	3.51	1.84	2.49	3.64
SsCNGC8-4D	1.83335	1.74157	1.53259	1.50629	1.39988	1.84635	1.76819	1.55235	0.161565	1.81896	1.72767	2.67043	2.7203	0.811704	0.896415	1.08111	1.8	1.72	1.53	1.98	0.93	1.63	2.01	2.33	0.82	1.88	2.41	1.97	1.72	1.02	2.07	1.97	1.38	3.55	2.76	2.59	2.37	2.26	1.72	2.38	1.57	2.42	1.76	1.69	2.61	2.8	2.66	1.84	0.93
SsCNGC9	2.12341	2.21475	1.51484	2.7597	2.75235	2.71323	1.2633	1.15987	1.92316	2.77548	2.95973	1.99072	2.21321	2.249	2.53441	2.71514	4.85	5.92	4.92	5.92	5.04	5.89	5.06	4.32	5.11	3.85	4.07	3.79	3.72	4.3	4.15	3.16	3.57	3.44	3.13	4.41	3.4	3.58	3.92	3.91	4.43	2.81	2.98	3.53	4.33	3.6	3.9	4.8	3.28
SsCNGC9-1T	11.9338	12.2286	10.6297	9.96065	11.6152	10.1518	7.95349	13.8029	8.99087	17.0319	18.5237	11.9828	9.59333	10.2973	13.405	10.8341	16.38	14.91	15.61	15.53	17.57	14.69	13.42	12.19	14.62	8.18	11.03	14.02	12.31	11.02	11.11	10.86	11.54	11.74	8.68	12.19	10.33	10.62	15.21	13.52	13.67	13.51	12.6	9.23	11.45	13.44	14.51	13.9	10.98
SsCNGC9-2D	5.29374	5.71204	4.41146	4.60558	4.40244	3.84954	2.29062	4.22195	2.71124	5.6518	6.81323	4.16188	2.90417	3.13141	5.0228	5.13353	12.21	14.29	12.42	14.23	13.82	13.04	9.85	12.28	13.08	13.62	10.52	7.77	8.9	11.78	12.42	9.72	12.54	12.36	12.06	13.07	13.89	10.31	14.02	9.44	9.91	11.32	12.32	11.44	11.92	11.71	12.62	13.27	12.5
SsCNGC10	1.11343	0.948774	0.952615	0.154926	0.0758793	0.156383	0.749249	0.251022	0.122548	0	0.0581943	0.993075	1.18046	0.0181147	0.0275851	0.0181516	0	0	0	0	0	0	0	0	0	0	0	0	0	0	0	0	0	0	0	0	0	0	0	0	0	0	0	0	0	0	0	0	0
SsCNGC10-1T	1.28101	1.42398	1.13239	0.176401	0.15805	0.316966	0.618925	0.417863	0	0.141348	0.0416634	1.32537	1.61975	0	0.0131248	0	0	0.09	0.16	0.13	0.16	0.08	0.76	0.48	0.43	1.39	1.18	1.12	1.44	1.31	0.97	2.44	1.5	2.71	2.11	2.22	2.35	1.69	1.04	1.72	1.22	3.23	3.08	3.49	4.61	4.21	3	3.35	1.9
SsCNGC10-2C	0.966829	1.50816	1.20456	0.056695	0.336017	0.101144	1.18409	0.283865	0	0	0	1.03275	1.90214	0	0.0115824	0	0.04	0.03	0.04	0.06	0.11	0.02	0.34	0.22	0.21	0.83	0.46	0.24	1.2	0.86	0.58	1.48	1	1.23	1.63	1.16	1.21	1.89	1.25	1.61	1.37	1.94	1.48	1.78	2.33	2.21	2.2	1.41	2.1
SsCNGC10-3D	2.46704	2.26277	2.22895	0.224585	0.228414	0.306839	1.03727	0.744415	0.125329	0.0336516	0.0396723	1.90211	2.55678	0.0185017	0.0344433	0.00927153	0.32	0	0.29	0.08	0.1	0.16	0.69	0.53	0	1.68	0.45	0.36	1.61	0.42	0.99	0.75	0.52	1.21	0.61	0.4	0.99	2.37	1.87	1.4	1.69	0.74	1.01	0.96	1.75	0.14	2.2	0	2.1
SsCNGC11	1.43875	1.35547	0.998405	0.181881	0.127725	0.322291	1.16365	0.682338	0	0.0365022	0.0430401	1.97191	1.47531	0.0199809	0.0135381	0.0200408	0	0.19	0	0.25	0.14	0.11	0.44	0.12	0.37	0.94	0.35	0.56	0.92	0.81	1.4	0.77	0.74	1.6	1.29	1.74	2.04	1.53	1.86	1.73	2.16	3.57	1.71	1.86	3.84	2.32	2.27	2.49	2.42
SsCNGC11-2B	0.969818	0.884742	0.877888	0.190462	0.0370216	0.131411	0.642237	0.349662	0	0	0	0.770495	1.5699	0	0.0189491	0.0187025	0	0.06	0	0.18	0.07	0.05	0.3	0.45	0.19	0.9	0.85	0.31	1.4	1.23	0.95	2.11	1.4	2.23	2.31	1.78	2.16	2.4	2.05	2.05	2.1	2.97	1.59	2.07	3.33	2.57	2.84	2.12	2.16
SsCNGC12-1C	1.50266	1.20902	0.998211	1.84364	1.69133	1.7739	0.877053	0.508371	0.133742	0.347847	0.854106	1.80522	2.04352	1.02847	0.88928	1.29943	3.34	3.35	3.72	2.67	2.31	2.21	1.13	2.63	2.12	2.91	4.66	2.38	2.98	4.75	3.37	2.49	6.43	4.92	4.07	4.42	3.84	1.59	4.36	4.6	1.81	2.06	3.11	1.33	2.01	1.76	1.32	1.18	2.06
SsCNGC12-2D	2.97289	2.65258	2.17688	5.20307	4.36292	4.18384	1.88759	2.51349	1.1062	2.2929	2.70714	4.00245	3.73629	2.0107	2.32405	2.87765	8.27	9.67	9.39	5.62	8.17	6.47	5.34	8.37	4.41	4.77	7.83	7.88	6.98	9.82	7.27	6.5	7.37	6.89	4.35	8.35	9.39	4.77	5.48	8.23	3.01	3.62	4.47	2.42	2.29	3.84	2.37	1.97	2.98
SsCNGC13	6.30089	6.62354	5.73969	7.36528	6.31829	5.56037	3.31586	2.36843	4.9894	9.98334	11.4414	7.14214	5.00733	5.23942	14.2748	9.33861	3.18	3.06	2.88	4.28	3.53	3.09	5.18	4.3	4.3	5.8	3.95	6.67	3.89	2.73	3.73	4.85	2.29	4.47	3.11	2.72	4.52	3.72	2.27	4.1	2.06	2.48	3.88	2.71	3.29	3.33	2.44	1.66	2.58
SsCNGC13-1P	23.7923	21.6923	23.2204	20.7833	22.2102	21.4344	14.5508	11.9386	17.3146	38.7232	39.8824	21.2724	16.3729	17.1673	47.1881	30.9532	22.81	21.12	20.28	22.31	25.4	18.53	26.7	27.76	21.92	30.91	27.13	29.34	26.61	25.42	30.24	23.82	19.83	29.89	23.76	26	28.6	22.4	20.77	28.52	14.48	21.91	24.69	13.68	23.73	21.52	19.54	11.44	18.19
SsCNGC14	0	0	0	0.663343	0.757243	1.09352	0	0	4.94262	0	0	0	0	7.22016	0	0	2.54	2.8	2.53	0.43	0.52	0.66	0.15	0.05	0.14	0.05	0	0.03	0	0	0	0	0	0	0	0.03	0	0	0	0	0	0	0	0	0	0	0	0.02	0
SsCNGC15	0	0	0	0.699523	0.139737	0.288924	0	0	0.730638	0	0	0	0	2.91461	0.10987	0	2.24	2.03	1.71	0.33	0.16	0.41	0.15	0.05	0.11	0	0	0	0	0	0.06	0	0	0	0	0	0	0	0	0	0	0	0	0	0	0	0	0	0
SsCNGC16	4.0302	3.77647	5.30354	3.09229	1.60034	1.99843	0.474673	0.636532	0.953844	0.96339	0.338018	4.52247	4.84537	0.709857	0.644292	0.812999	1.45	1.81	0.93	2.62	4.79	2.16	3.52	8.26	3.38	2.34	6.89	3.18	3.62	2.78	2.38	2.86	1.83	1.95	2.81	3.17	2.39	3.7	2.24	2.74	3.24	5.36	3.39	6.79	6.04	3.07	7.69	7.25	4.36
SsCNGC16-2B	1.83733	2.2469	3.68347	1.81368	1.78234	1.8092	0.152454	0.59282	1.95601	0.808417	0.714685	2.87317	3.31391	0.735144	0.563053	0.435466	4.21	5.88	3.68	5.97	6.48	5.13	6.45	10.07	6.58	4.19	5.12	5.05	2.08	2.59	2.54	2.07	1.71	1.89	2.68	1.29	1.57	1.87	1.27	1.19	1.36	3.21	2.53	2.91	3.67	2.15	3.18	2.96	1.55
SsCNGC16-3C	2.37011	2.30457	4.03634	2.03697	1.54654	1.88434	0.445309	0.167794	1.11841	0.452503	0.74933	3.045	2.51142	0.741211	0.47884	0.427335	4.5	4.21	3.92	3.89	5.9	4.61	6.07	6.59	6.43	4.81	5.15	6.67	2.8	3.21	2.78	2.26	1.14	2.34	1.8	0.71	1.68	1.74	1.43	1.65	1.63	1.62	1.33	1.86	2.43	2.02	2.47	2.62	1.43
SsCNGC16-4D	3.4234	3.078	4.24354	3.45873	2.29448	2.11842	0.467558	0.814574	1.13094	0.784235	0.413088	3.90285	4.0277	0.749527	0.826262	0.699027	4.37	3.86	3.7	4.38	7.59	5.46	5.45	7.7	5.2	3.73	5.19	4.23	2.62	2.44	2.6	2.43	1.67	1.69	3.28	1.82	1.68	4.27	1.89	2.55	4.01	5.73	3.43	6.16	6.68	4.54	6.89	6.21	5.19
[truncated: 11 more columns]
