# Supplementary material for: Genome-wide identification and expression analysis of the cyclic nucleotide-gated ion channel (CNGC) gene family in Saccharum spontaneum
Source: BMC Genomics. 2023 May 25;24:281. doi: 10.1186/s12864-023-09307-3 (PMC10214738; doi:10.1186/s12864-023-09307-3)
Supplement: Supplementary file 11 — Additional file 11: Supplementary Table 6. The expression pattern of SsCNGCs based on FPKM under low-K+ stress. [file 12864_2023_9307_MOESM11_ESM.xlsx]

## Sheet: Sheet 1
Supplementary Table 6: The expression pattern of SsCNGCs based on FPKM under low-K+ stress.
	0 h			6 h			12 h			24 h			48 h			72 h
name	S1-0-1	S1-0-2	S1-0-3	S1-6-1	S1-6-2	S1-6-3	S1-12-1	S1-12-2	S1-12-3	S1-24-1	S1-24-2	S1-24-3	S1-48-1	S1-48-2	S1-48-3	S1-72-1	S1-72-2	S1-72-3
SsCNGC1	23.4863	29.3744	23.3261	17.5077	18.6733	16.5087	23.3539	21.4366	20.6542	19.6899	20.6244	23.2657	19.2005	24.905	22.1912	16.2091	15.7168	18.217
SsCNGC1-1P	7.88277	11.1426	0	7.66625	7.1175	6.78442	8.72144	0.009851	3.04776	10.736	1.49164	3.50506	2.25352	11.7044	9.88118	7.02653	6.38798	0.157073
SsCNGC1-2C	4.69287	0.319379	4.6136	4.54812	7.25442	5.58698	0.604183	6.52393	0.282843	0.615582	6.56842	7.47085	0.181671	6.97075	6.37181	1.33945	5.64121	6.95023
SsCNGC2-1A	7.64931	8.88066	3.70702	10.4003	9.2669	11.0976	8.45232	8.83537	8.93231	6.87082	8.30145	7.22921	6.16355	6.44539	7.91892	4.71772	4.52163	5.80916
SsCNGC2	8.45695	6.30954	6.83037	9.81065	11.262	11.3878	10.3456	10.3148	9.02249	7.59002	7.77002	8.32282	7.07376	8.17558	7.58286	5.59932	4.09213	7.2021
SsCNGC2-2B	0	0	0	0	0	0	0	0	0	0	0	0	0.105306	0	0.155621	0	0	0
SsCNGC3	0.125465	0.151161	0.090861	0	0.265938	0	0	0.040836	0.037304	0	0.394851	0.103214	0.146009	0.216883	0.128868	0.097497	0.163197	0.269599
SsCNGC3-2B	0.176039	0.06712	0.14199	0	0	0	0.21987	0.078536	0.064878	0.036481	0	0.140344	0	0	0.029751	0	0.223396	0.036527
SsCNGC4	21.1959	23.6999	18.1953	18.399	19.0705	19.0279	20.2538	18.9648	14.4628	18.7015	24.0065	23.4395	18.1236	22.4022	23.5992	25.5874	18.4804	19.9732
SsCNGC4-2D	11.314	11.8519	14.7066	9.40033	10.5327	9.37128	10.4934	12.9488	13.8864	9.66087	13.5752	12.3522	8.85926	14.4157	15.6742	11.7633	11.993	9.56085
SsCNGC5	0	0	0	0	0	0	0.136162	0	0.042694	0	0.039932	0	0.043956	0	0	0	0	0
SsCNGC5-2B	0	0	0	0	0	0	0	0	0	0	0	0	0	0	0	0	0	0
SsCNGC5-3C	0	0	0	0	0	0	0.030486	0	0	0	0	0	0	0	0.041389	0	0	0
SsCNGC5-4D	0	0	0	0	0	0	0.030443	0	0	0	0	0	0	0	0	0	0	0
SsCNGC6	0	0	0	0.019813	0	0	0	0	0	0.038098	0	0	0.143618	0.03853	0	0	0	0.004951
SsCNGC6-2D	0	0	0	0.043509	0	0	0	0.041009	0	0.038098	0	0	0	0	0	0.034818	0	0.004951
SsCNGC7	9.70877	9.54474	0.860183	8.71958	9.65939	1.96934	3.57229	3.86706	9.43793	4.56531	2.86362	8.82126	2.5032	8.85069	9.15933	2.97511	7.797	7.94097
SsCNGC7-2B	9.87072	9.73267	10.0693	6.99672	7.97921	8.72535	15.4243	9.11178	10.2457	8.32823	9.6026	8.37025	9.18086	7.97191	9.85468	7.95915	7.02911	6.84394
SsCNGC7-3D	9.47551	9.45126	8.1639	10.977	9.56548	13.9892	9.63119	11.782	8.7307	14.1095	10.0816	9.42406	9.44444	9.29465	9.29742	6.601	7.70771	8.50446
SsCNGC8	12.1896	13.0597	10.3432	8.24787	10.9731	9.25377	10.0271	11.9169	9.65677	9.02111	11.1741	11.7332	10.258	12.2085	11.9129	8.42162	6.89274	8.51829
SsCNGC8-2B	8.58606	7.64603	6.91727	5.32631	7.55048	5.89499	7.65896	7.44085	6.27584	5.35193	6.00203	6.2914	6.33272	6.89788	7.05312	4.6535	5.0751	4.22019
SsCNGC8-3C	5.87935	5.10691	4.56897	4.15749	4.92503	3.86699	4.72579	5.51415	4.02785	4.05713	5.2291	4.95394	4.37489	4.38547	5.035	3.37427	2.43755	2.87433
SsCNGC8-4D	6.47571	6.66071	6.37099	4.4323	2.50369	2.69801	3.45634	4.02938	3.40626	4.64637	4.93593	4.78997	3.99193	2.95639	5.40253	3.09579	2.21114	3.61329
SsCNGC9	14.3034	14.6472	14.2745	16.2908	14.9782	15.2786	16.8597	15.3778	14.821	13.0295	14.2328	14.5877	12.6087	14.508	15.5077	11.5258	11.0583	10.9575
SsCNGC9-1T	10.4254	4.39159	2.52088	12.0926	4.3884	9.70008	13.3584	10.6029	4.12263	8.68175	10.2864	11.1145	10.4627	4.98007	4.82284	7.96903	4.50137	8.51797
SsCNGC9-2D	9.21298	10.1315	3.57031	10.2055	10.372	5.77876	7.11833	9.07388	10.1637	7.87538	4.60605	4.55379	6.35494	6.18635	9.74636	3.8972	4.25962	4.77305
SsCNGC10	0.074765	0	0	0	0.037906	0	0	0.089742	0	0	0	0	0	0.043372	0	0	0.103074	0
SsCNGC10-1T	0.03488	0.171018	0.156406	0	0	0.063337	0	0.195089	0.192526	0.03692	0.099084	0	0	0	0.139382	0.15168	0	0.073563
SsCNGC10-2C	0.078165	0	0.073557	0.044236	0	0	0.046503	0.178182	0	0.072015	0.027338	0.207145	0.086984	0	0	0	0.046401	0.104497
SsCNGC10-3D	0	0	0	0	0	0	0	0	0.241735	0	0	0.213366	0.062131	0	0	0	0.074148	0
SsCNGC11	0	0	0	0	0	0.253635	0.097945	0.016422	0.196201	0	0	0	0	0	0	0.081133	0.019588	0
SsCNGC11-2B	0	0	0.123547	0.124271	0.082484	0.153602	0.121703	0	0	0.125222	0.038087	0	0.109915	0	0	0	0.107132	0.037488
SsCNGC12	2.11745	2.44552	3.82854	0.757662	0.456956	0.48855	1.73738	1.50952	1.21266	1.16154	1.07017	0.963099	1.45877	1.86122	1.74487	1.71161	1.25456	1.04762
SsCNGC12-2D	5.10697	4.00234	8.23395	2.48258	3.04406	1.59195	3.83492	2.70136	2.7722	2.2441	2.75902	2.26674	4.4489	4.97769	4.24373	2.81144	3.96596	3.53273
SsCNGC13	0	0	3.01195	0	0.414622	0	0	0.473835	0	0	0	0	0	0	0.569591	0	0	0
SsCNGC13-1P	3.14042	3.36006	5.7603	0.313504	1.06133	0.254276	0.145026	1.45385	0.591684	4.54999	2.36649	3.992	1.73256	1.5127	0.833307	19.4899	8.80211	9.48338
SsCNGC14	0.056261	0.124918	0.222342	0	0.053826	0	0	0.081704	0.679552	0.250644	0.166859	0.397482	0.262648	0.422739	0.247102	0.218914	0.310876	0.290614
SsCNGC15	0	0	0.116179	0	0	0	0	0.060794	0.061132	0	0	0	0	0	0	0	0	0.054141
SsCNGC16	0.618975	0.770289	0.936776	0.056507	0	0.1164	0	0.226632	0.083867	0	0.386438	0.128016	0.363719	0.222108	0.073519	1.52729	0.670426	0.964901
SsCNGC16-2B	0.035712	0.037954	0.29198	0.101646	0.169991	0.067003	0	0.184487	0.150987	0.063085	0.074935	0.070707	0	0.284349	0.109365	1.45396	0.651132	0.747968
SsCNGC16-3C	0.486585	0.671982	0.279951	0.204564	0.057372	0	0.075461	0	0.128156	0.197005	0.293734	0.215397	0.214745	0.32901	0.081608	0.96409	0.684771	0.655418
SsCNGC16-4D	0.162791	0.619003	0.295932	0.141509	0.151404	0.171793	0.148837	0.088607	0.040122	0.405212	0.099008	0.130705	0.345889	0.058181	0.253906	0.603243	0.543146	0.675424
